# Supplementary material for: Comparative Phytochemical Analyses and Metabolic Profiling of Different Phenotypes of Chinese Cabbage (Brassica Rapa ssp. Pekinensis)
Source: PubMed Central journal article supplement (PMC6915346; doi:10.3390/foods8110587), 2019-11-19
Supplement: foods-08-00587-s001.pdf [file foods-08-00587-s001.pdf]

**Figure S1.** The chromatogram of metabolites obtained from and oval shape Chinese cabbage using GC-TOFMS and HPLC.

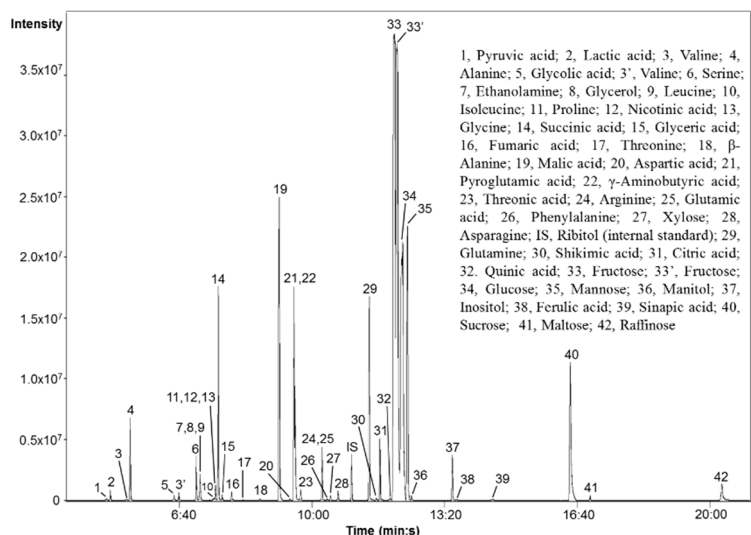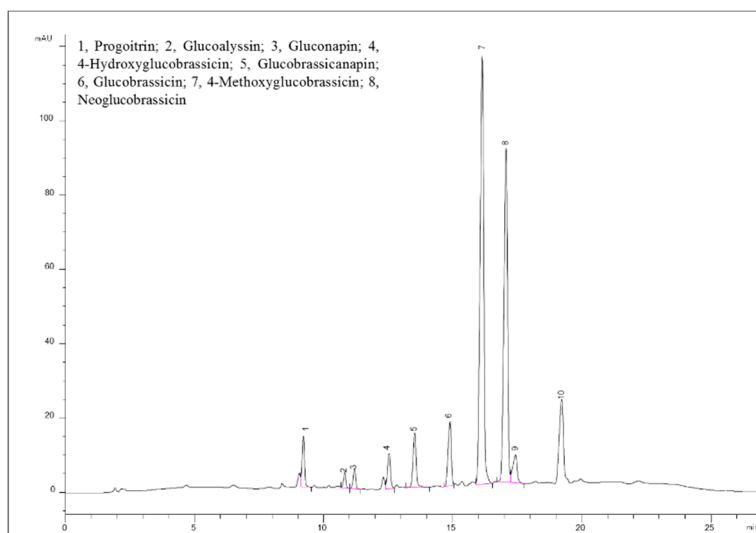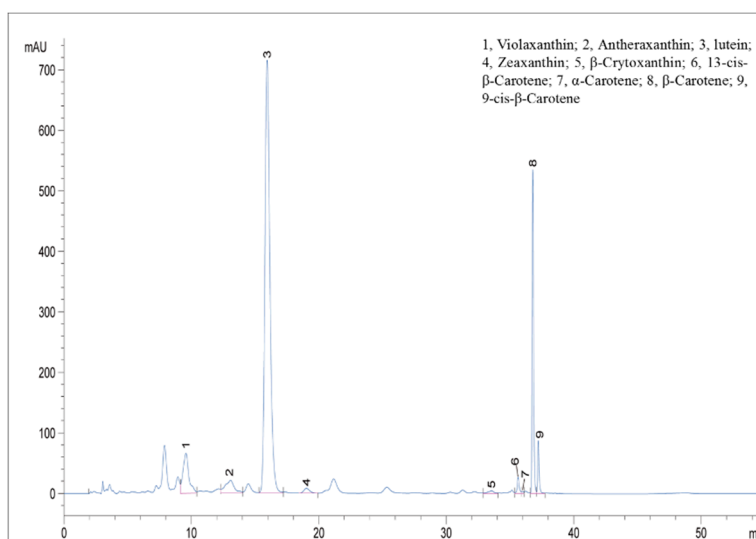

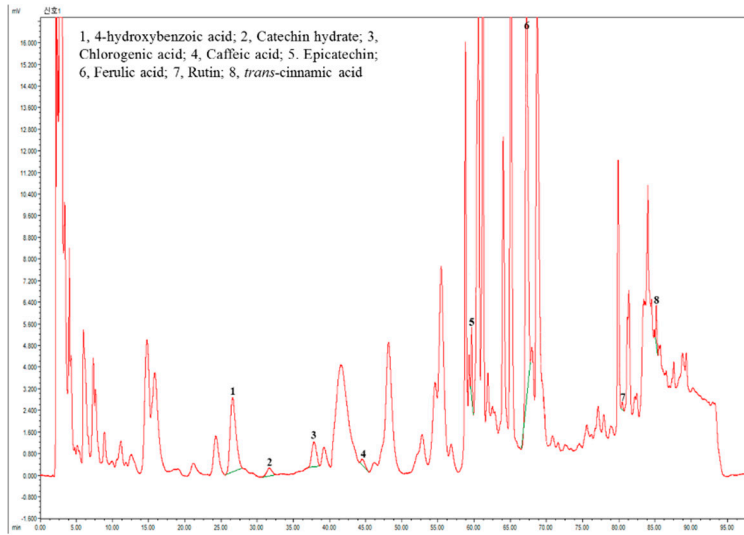

**Figure S2.** Metabolite peak height differences of rectangular and oval shape Chinese cabbage using GC-TOFMS. X axis indicates relative intensity. Asterisks indicate significant differences (*t*-test, \*  $p < 0.05$ , \*\*  $p < 0.01$ , \*\*\*  $p < 0.005$ ).

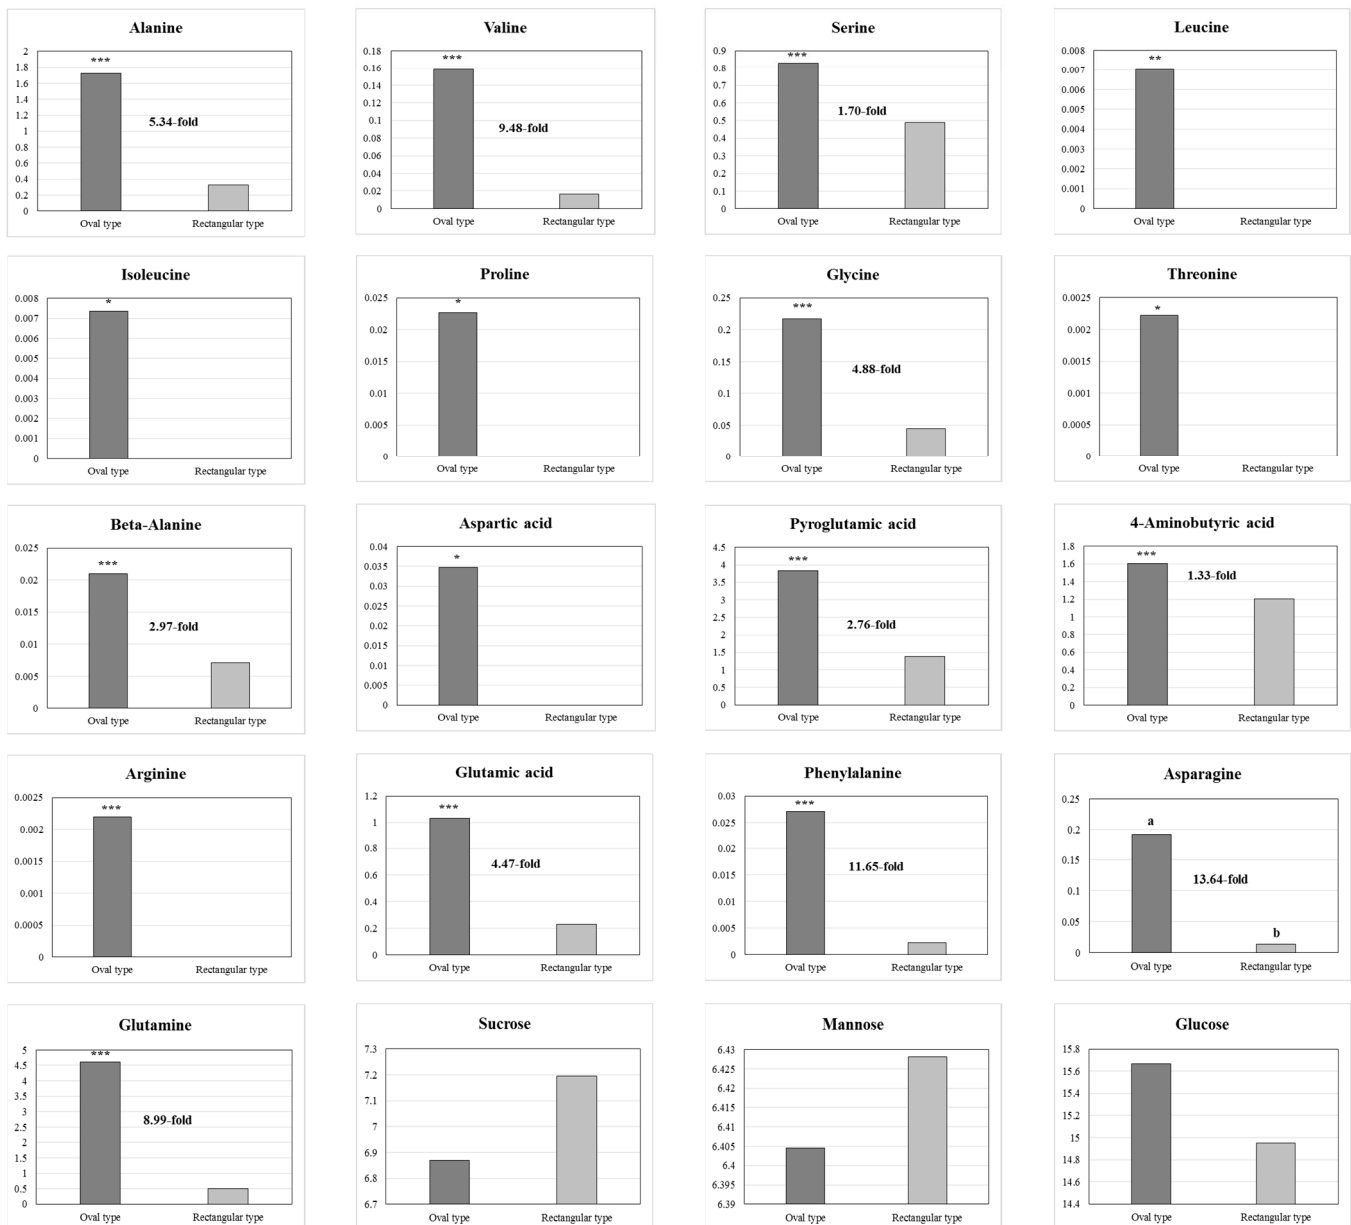

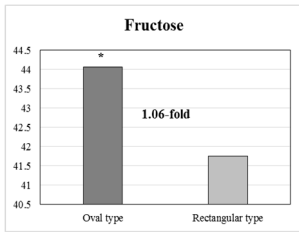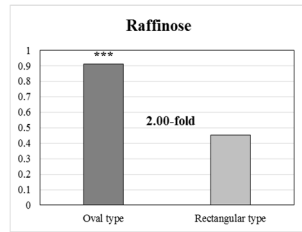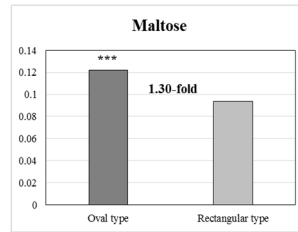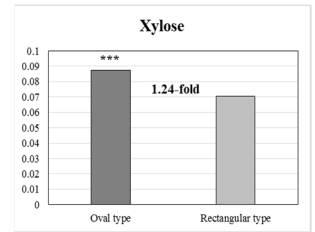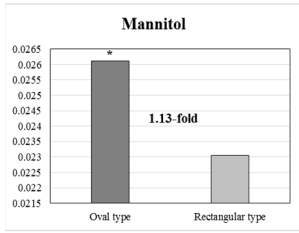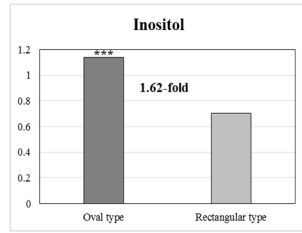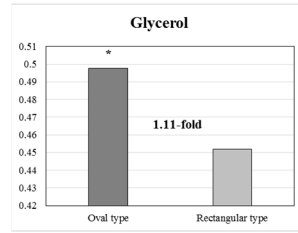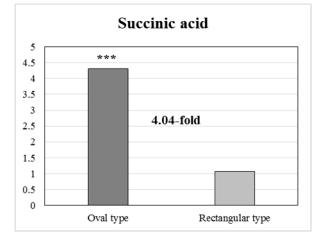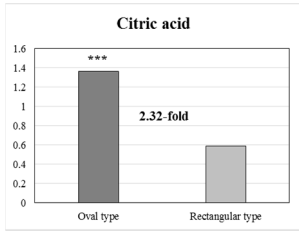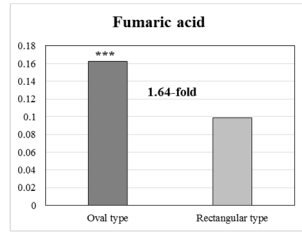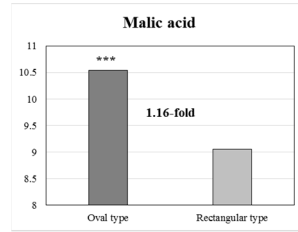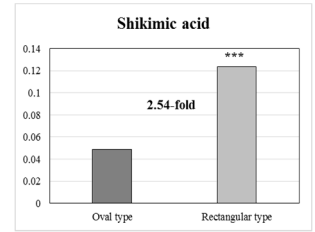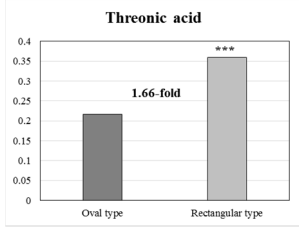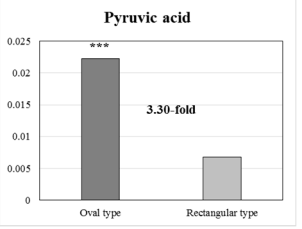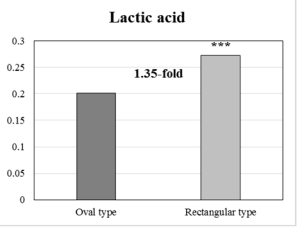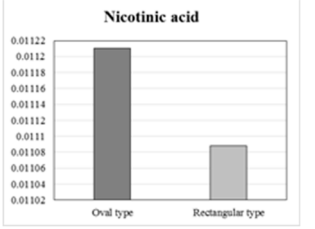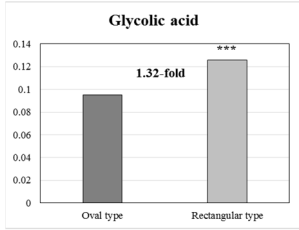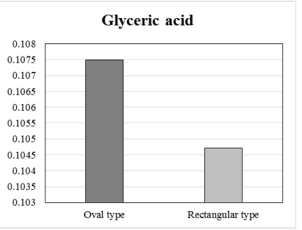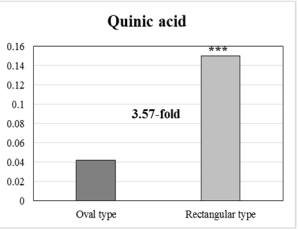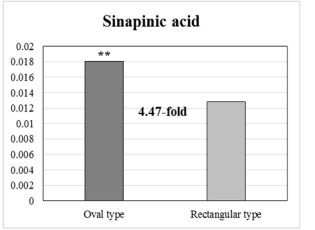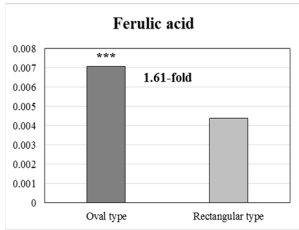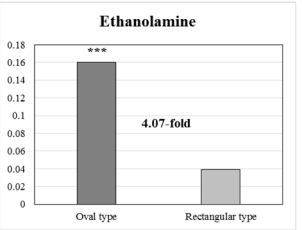

**Table S1.** Differential metabolites between rectangular and oval shape Chinese cabbage derived from the PLS-DA model of GC-TOFMS analysis.

| Metabolite          | VIP † | p Value ‡ | Fold Change § |
|---------------------|-------|-----------|---------------|
| Glycine             | 1.164 | <0.0001   | 4.88±0.08     |
| Succinic acid       | 1.164 | <0.0001   | 4.04±0.08     |
| Ethanolamine        | 1.164 | <0.0001   | 4.09±0.36     |
| Citric acid         | 1.163 | <0.0001   | 2.32±0.10     |
| Glutamine           | 1.163 | <0.0001   | 9.33±2.02     |
| β-Alanine           | 1.163 | <0.0001   | 2.98±0.18     |
| Serine              | 1.163 | <0.0001   | 1.70±0.02     |
| Asparagine          | 1.162 | <0.0001   | 13.90±2.47    |
| Glutamic acid       | 1.162 | <0.0001   | 4.57±0.86     |
| Raffinose           | 1.162 | <0.0001   | 2.01±0.05     |
| Inositol            | 1.161 | <0.0001   | 1.62±0.06     |
| Quinic acid         | 1.161 | 0.0015    | 0.28±0.01     |
| Fumaric acid        | 1.161 | <0.0001   | 1.64±0.03     |
| Threonic acid       | 1.160 | <0.0001   | 0.60±0.01     |
| Phenylalanine       | 1.159 | <0.0001   | 12.10±2.80    |
| Shikimic acid       | 1.158 | <0.0001   | 0.39±0.02     |
| Maltose             | 1.156 | <0.0001   | 1.30±0.04     |
| Valine              | 1.155 | <0.0001   | 9.64±1.59     |
| Xylose              | 1.154 | 0.0001    | 1.24±0.01     |
| Alanine             | 1.154 | 0.0001    | 7.12±5.21     |
| 4-Aminobutyric acid | 1.153 | 0.0001    | 1.33±0.03     |
| Glycolic acid       | 1.144 | 0.0005    | 0.76±0.02     |
| Pyruvic acid        | 1.143 | 0.0005    | 3.31±0.34     |
| Malic acid          | 1.140 | 0.0007    | 1.16±0.03     |
| Pyroglutamic acid   | 1.138 | 0.0112    | 2.77±0.37     |
| Ferulic acid        | 1.122 | 0.0021    | 1.64±0.23     |
| Lactic acid         | 1.098 | 0.0048    | 0.74±0.07     |
| Glycerol            | 1.063 | 0.0427    | 1.10±0.04     |
| Sinapinic acid      | 1.060 | 0.0122    | 1.44±0.25     |

† Variable importance in the projection (VIP) was obtained from the PLS-DA model with a threshold of 1.0. ‡P value obtained from Student's *t*-test. § Fold change between rectangle and oval type. The values are expressed relative to rectangle type and presented as the mean ± SD of determinations from three independent samples.

**Table S2.** Morphological characteristics of oval and rectangular shape Chinese cabbage.

| Phenotype                         | Height (cm)                  | Width (cm)     | Number of Leaves | Head Weight (kg) | Color      |
|-----------------------------------|------------------------------|----------------|------------------|------------------|------------|
| Oval shape Chinese cabbage        | 25.25 ± 3.86                 | 18.75± 1.50*** | 64.00 ± 6.58***  | 2.21 ± 0.23      | Green      |
| Rectangular shape Chinese cabbage | 48.80 ± 1.64*** <sup>1</sup> | 12.20 ± 1.10   | 39.60 ± 2.61     | 2.12 ± 0.23      | Deep green |

<sup>1</sup> Asterisks indicate significant differences (*t*-test, \* *p* < 0.05, \*\* *p* < 0.01, \*\*\* *p* < 0.005).

**Table S3.** Metabolites identified in GC-TOFMS chromatograms of oval-type Chinese cabbage.

| Compound       | RT <sup>†</sup> | RRT <sup>‡</sup> | Selected Ion for Quantification <sup>§</sup> | Mass Fragment <sup>#</sup> |
|----------------|-----------------|------------------|----------------------------------------------|----------------------------|
| Pyruvic acid   | 4.835           | 0.440            | 174                                          | 115, 174, 189              |
| Lactic acid    | 4.933           | 0.449            | 147                                          | 117, 147, 191              |
| Valine         | 5.330           | 0.485            | 146                                          | 130, 146, 156              |
| Alanine        | 5.433           | 0.494            | 116                                          | 116, 147, 190              |
| Glycolic acid  | 6.383           | 0.580            | 147                                          | 147, 177, 205              |
| Serine         | 7.098           | 0.645            | 116                                          | 116, 132, 147              |
| Ethanolamine   | 7.180           | 0.653            | 174                                          | 100, 147, 174              |
| Glycerol       | 7.193           | 0.654            | 147                                          | 103, 117, 147              |
| Leucine        | 7.215           | 0.656            | 158                                          | 102, 147, 158              |
| Isoleucine     | 7.432           | 0.676            | 158                                          | 147, 158, 218              |
| Proline        | 7.518           | 0.684            | 142                                          | 142, 158, 216              |
| Nicotinic acid | 7.550           | 0.687            | 180                                          | 106, 136, 180              |
| Glycine        | 7.577           | 0.689            | 174                                          | 147, 174, 248              |
| Succinic acid  | 7.645           | 0.695            | 147                                          | 129, 147, 247              |

|                     |        |       |     |               |
|---------------------|--------|-------|-----|---------------|
| Glyceric acid       | 7.747  | 0.704 | 147 | 133, 147, 189 |
| Fumaric acid        | 7.983  | 0.726 | 245 | 143, 147, 245 |
| Threonine           | 8.268  | 0.752 | 219 | 101, 117, 219 |
| $\beta$ -Alanine    | 8.695  | 0.791 | 174 | 147, 174, 248 |
| Malic acid          | 9.182  | 0.835 | 147 | 147, 233, 245 |
| Aspartic acid       | 9.448  | 0.859 | 100 | 100, 147, 232 |
| Pyroglutamic acid   | 9.550  | 0.868 | 156 | 147, 156, 230 |
| 4-Aminobutyric acid | 9.578  | 0.871 | 174 | 147, 174, 304 |
| Threonic acid       | 9.722  | 0.884 | 147 | 147, 205, 220 |
| Arginine            | 10.223 | 0.930 | 142 | 142, 147, 162 |
| Glutamic acid       | 10.257 | 0.933 | 246 | 128, 156, 246 |
| Phenylalanine       | 10.390 | 0.945 | 218 | 100, 192, 218 |
| Xylose              | 10.470 | 0.952 | 103 | 103, 147, 217 |
| Asparagine          | 10.657 | 0.969 | 116 | 116, 132, 231 |
| IS                  | 10.997 | 1.000 | 217 | 103, 147, 217 |
| Glutamine           | 11.443 | 1.041 | 156 | 147, 156, 245 |
| Shikimic acid       | 11.618 | 1.056 | 204 | 147, 204, 255 |
| Citric acid         | 11.710 | 1.065 | 273 | 147, 273, 347 |
| Quinic acid         | 11.972 | 1.089 | 345 | 147, 255, 345 |
| Fructose            | 12.057 | 1.096 | 103 | 103, 147, 217 |
| Glucose             | 12.285 | 1.117 | 147 | 147, 160, 205 |
| Mannose             | 12.402 | 1.128 | 147 | 147, 205, 319 |
| Manitol             | 12.500 | 1.137 | 319 | 147, 217, 319 |
| Inositol            | 13.532 | 1.231 | 305 | 147, 217, 305 |
| Ferulic acid        | 13.633 | 1.240 | 338 | 308, 323, 338 |
| Sinapic acid        | 14.527 | 1.321 | 338 | 338, 353, 368 |
| Sucrose             | 16.497 | 1.500 | 217 | 147, 217, 361 |
| Maltose             | 16.992 | 1.545 | 147 | 147, 204, 361 |
| Raffinose           | 20.302 | 1.846 | 217 | 204, 217, 361 |

<sup>†</sup> Retention time (min). <sup>‡</sup> Relative retention time (retention time of the analyte/retention time of the IS). <sup>§</sup> Specific mass ion used for quantification. <sup>#</sup> First three ions with the highest intensities.
